# Supplementary material for: Elemental detection of fluorochemicals by nanospray-induced chemical ionization in afterglow of an inductively coupled plasma
Source: Royal Society of Chemistry journal article supplement (doi:10.1039/d1ja00449b), 2022-01-01
Supplement: d1ja00449b1.pdf [file d1ja00449b1.pdf]

## Electronic Supplementary Information

### Elemental Detection of Fluorochemicals by Nanospray-Induced Chemical Ionization in Afterglow of an Inductively Coupled Plasma

Samuel White, Kunyu Zheng,<sup>α</sup> Jordan Tanen, Joseph E. Lesniewski,<sup>β</sup> and Kaveh Jorabchi\*

Department of Chemistry, Georgetown University, Washington, D.C. 20057, United States

\* Corresponding author, kj256@georgetown.edu

<sup>α</sup> Currently at AbbVie Inc., North Chicago, IL, 60064, United States

<sup>β</sup> Currently at Wilson Sonsini Goodrich & Rosati, Washington, D.C. 20006, United States

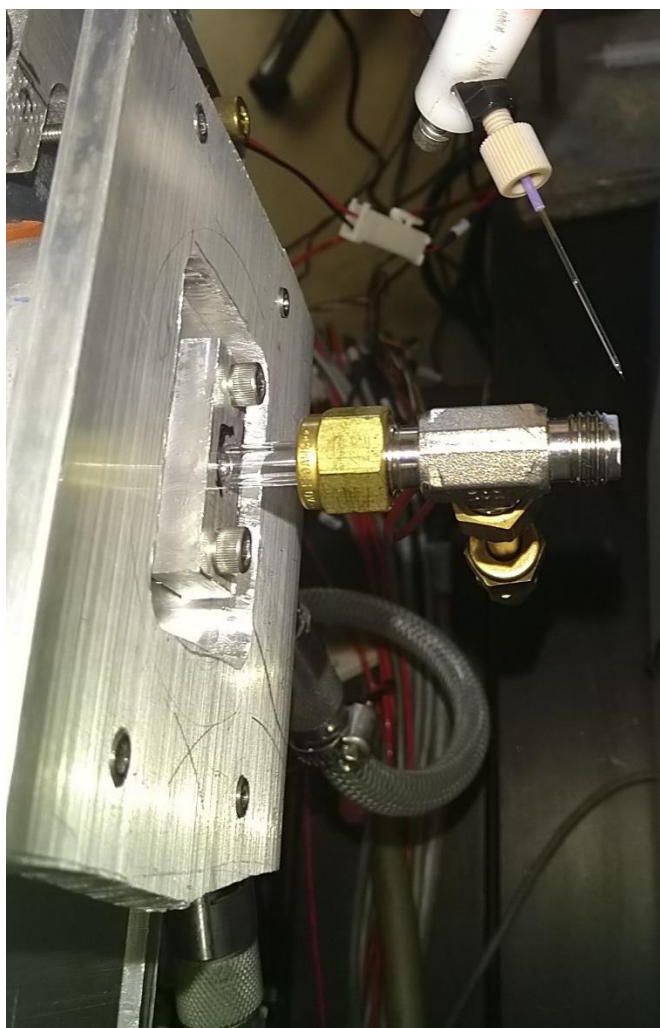

**Figure S1.** Ionization area of the ICP-nanospray-MS setup, showing the cooled aluminum plate of the ICP interface coupled to a quartz plasma sampling tube, a venturi tee, and a nanospray emitter.

**Examination of soft ion sampling spectrum.** To investigate the effect of fragmentation during ion sampling on appearance of  $\text{BaOH}^+$  and  $m/z$  168, we collected a background spectrum with softer sampling by lowering declustering potential (DP) from 50 V to 10 V. Figure S2 provides annotation of ions with intensities  $\geq 320000$  cps. This intensity threshold was established based on the lowest intensity hydrated barium species detected in the spectra, namely  $\text{BaOH}(\text{H}_2\text{O})^+$ , and corresponds to 4.4% of that of the most intense ion in the spectrum, providing a reasonable cut off threshold for identification of potential reagent ions. A list of ions and their intensities is tabulated in Table S1.

As noted in Figure S2 and Table S1, several solvated species of each core ion are detected. The solvation is dramatically reduced via ion activation at declustering potential of 50 V (see Figure 7A in the article). Therefore, to compare the prevalence of core ions between declustering potentials of 50 and 10 V, we utilized an aggregate intensity equal to the sum of intensities of each core ion and its solvated species. For example, for the core ion  $\text{BaOH}^+$  three solvated ions have been detected in soft sampling conditions,  $\text{BaOH}^+$ ,  $\text{BaOH}(\text{H}_2\text{O})^+$ , and  $\text{BaOH}(\text{H}_2\text{O})_2^+$ , with intensities of 596124, 664138, and 492102 cps, respectively, resulting in total prevalence of 1752364 for this core ion.

Table S2 summarizes such aggregate intensities for each core ion at both soft (10 V DP) and harsh (50 V DP) ion sampling conditions. The ratio of the intensities between the two sampling conditions provides a metric for the effect of ion sampling on prevalence of each core ion. Notably, only  $\text{BaOH}^+$  and  $m/z$  168 show a significant improvement in prevalence when harsh ion sampling is utilized, supporting the hypothesis that these species are mainly products of fragmentation in ion sampling.

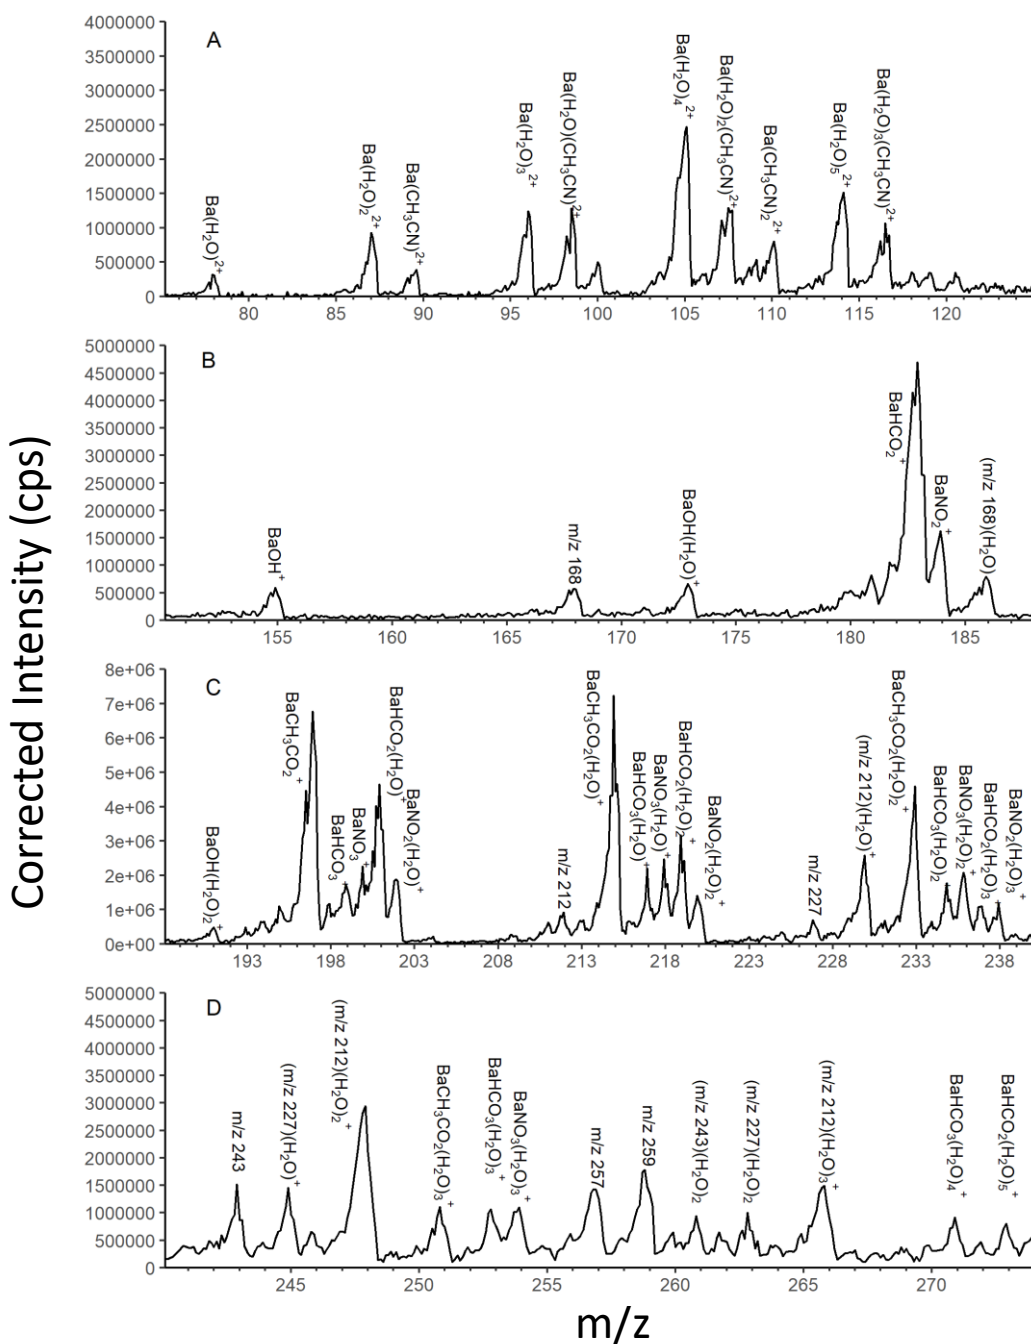

**Figure S2.** Proposed ion formulas in background spectrum of ICP-nanospray-MS using soft ion sampling conditions (declustering potential of 10 V) and 1 mM barium acetate as the nanospray electrolyte. Note that the total spectrum is split to four  $m/z$  ranges via panels A to D for ease of presentation. A sampling orifice size of 4 mm and a  $N_2$  gas flow rate of 2.1 L/min introduced into the venturi tee were utilized in these experiments.

**Table S1. Ion intensities using soft ion sampling conditions**

| <b>m/z</b> | <b>Ion</b>                                                           | <b>Intensity<br/>(cps)</b> | <b>m/z</b> | <b>Ion</b>                                                                     | <b>Intensity<br/>(cps)</b> |
|------------|----------------------------------------------------------------------|----------------------------|------------|--------------------------------------------------------------------------------|----------------------------|
| 78         | Ba(H <sub>2</sub> O) <sup>+2</sup>                                   | 320067                     | 217        | BaHCO <sub>3</sub> (H <sub>2</sub> O) <sup>+</sup>                             | 2208460                    |
| 87         | Ba(H <sub>2</sub> O) <sub>2</sub> <sup>+2</sup>                      | 928193                     | 218        | BaNO <sub>3</sub> (H <sub>2</sub> O) <sup>+</sup>                              | 2472515                    |
| 89.5       | Ba(CH <sub>3</sub> CN) <sup>+2</sup>                                 | 388081                     | 219        | BaHCO <sub>2</sub> (H <sub>2</sub> O) <sub>2</sub> <sup>+</sup>                | 3164659                    |
| 96         | Ba(H <sub>2</sub> O) <sub>3</sub> <sup>+2</sup>                      | 1244259                    | 220        | BaNO <sub>2</sub> (H <sub>2</sub> O) <sub>2</sub> <sup>+</sup>                 | 1408293                    |
| 98.5       | Ba(H <sub>2</sub> O)(CH <sub>3</sub> CN) <sup>+2</sup>               | 1284267                    | 227        | Unknown                                                                        | 692144                     |
| 105        | Ba(H <sub>2</sub> O) <sub>4</sub> <sup>+2</sup>                      | 2472515                    | 230        | (m/z 212)(H <sub>2</sub> O)                                                    | 2584538                    |
| 107.5      | Ba(H <sub>2</sub> O) <sub>2</sub> (CH <sub>3</sub> CN) <sup>+2</sup> | 1288268                    | 233        | BaCH <sub>3</sub> CO <sub>2</sub> (H <sub>2</sub> O) <sub>2</sub> <sup>+</sup> | 4592956                    |
| 110        | Ba(CH <sub>3</sub> CN) <sub>2</sub> <sup>+2</sup>                    | 804167                     | 235        | BaHCO <sub>3</sub> (H <sub>2</sub> O) <sub>2</sub> <sup>+</sup>                | 1768368                    |
| 114        | Ba(H <sub>2</sub> O) <sub>5</sub> <sup>+2</sup>                      | 1516316                    | 236        | BaNO <sub>3</sub> (H <sub>2</sub> O) <sub>2</sub> <sup>+</sup>                 | 2080433                    |
| 116.5      | Ba(H <sub>2</sub> O) <sub>3</sub> (CH <sub>3</sub> CN) <sup>+2</sup> | 1068222                    | 237        | BaHCO <sub>2</sub> (H <sub>2</sub> O) <sub>3</sub> <sup>+</sup>                | 1096228                    |
| 155        | BaOH <sup>+</sup>                                                    | 596124                     | 238        | BaNO <sub>2</sub> (H <sub>2</sub> O) <sub>3</sub> <sup>+</sup>                 | 1172244                    |
| 168        | Unknown                                                              | 564117                     | 243        | Unknown                                                                        | 1516315                    |
| 173        | BaOH(H <sub>2</sub> O) <sup>+</sup>                                  | 664138                     | 245        | (m/z 245)(H <sub>2</sub> O)                                                    | 1456303                    |
| 183        | BaHCO <sub>2</sub> <sup>+</sup>                                      | 4700979                    | 248        | (m/z 212)(H <sub>2</sub> O) <sub>2</sub>                                       | 2944613                    |
| 184        | BaNO <sub>2</sub> <sup>+</sup>                                       | 1624338                    | 251        | BaCH <sub>3</sub> CO <sub>2</sub> (H <sub>2</sub> O) <sub>3</sub> <sup>+</sup> | 1104230                    |
| 186        | (m/z 168)(H <sub>2</sub> O)                                          | 796166                     | 253        | BaHCO <sub>3</sub> (H <sub>2</sub> O) <sub>3</sub> <sup>+</sup>                | 1068222                    |
| 191        | BaOH(H <sub>2</sub> O) <sub>2</sub> <sup>+</sup>                     | 492102                     | 254        | BaNO <sub>3</sub> (H <sub>2</sub> O) <sub>3</sub> <sup>+</sup>                 | 1100229                    |
| 197        | BaCH <sub>3</sub> CO <sub>2</sub> <sup>+</sup>                       | 6773410                    | 257        | Unknown                                                                        | 1432298                    |
| 199        | BaHCO <sub>3</sub> <sup>+</sup>                                      | 1736362                    | 259        | Unknown                                                                        | 1784372                    |
| 200        | BaNO <sub>3</sub> <sup>+</sup>                                       | 2260471                    | 261        | (m/z 243)(H <sub>2</sub> O)                                                    | 944190                     |
| 201        | BaHCO <sub>2</sub> (H <sub>2</sub> O) <sup>+</sup>                   | 4648968                    | 263        | (m/z 227)(H <sub>2</sub> O) <sub>2</sub>                                       | 1004205                    |
| 202        | BaNO <sub>2</sub> (H <sub>2</sub> O) <sup>+</sup>                    | 1888393                    | 266        | (m/z 212)(H <sub>2</sub> O) <sub>3</sub>                                       | 1492311                    |
| 212        | Unknown                                                              | 924192                     | 271        | BaCH <sub>3</sub> CO <sub>2</sub> (H <sub>2</sub> O) <sub>4</sub> <sup>+</sup> | 912190                     |
| 215        | BaCH <sub>3</sub> CO <sub>2</sub> (H <sub>2</sub> O) <sup>+</sup>    | 7233506                    |            |                                                                                |                            |

**Table S2. Core ion aggregate intensities**

| <b>Core Ion</b>                                | <b>Aggregate Intensity in Soft Sampling (cps)</b> | <b>Aggregate Intensity in Harsh Sampling (cps)</b> | <b>Ratio of Harsh to Soft Sampling Intensities</b> |
|------------------------------------------------|---------------------------------------------------|----------------------------------------------------|----------------------------------------------------|
| Ba <sup>2+</sup>                               | 11314355                                          | 6141850                                            | 0.5                                                |
| BaOH <sup>+</sup>                              | 1752364                                           | 3965969                                            | 2.3                                                |
| m/z 168                                        | 1360283                                           | 6033828                                            | 4.4                                                |
| BaHCO <sub>2</sub> <sup>+</sup>                | 13610834                                          | 15730133                                           | 1.2                                                |
| BaNO <sub>2</sub> <sup>+</sup>                 | 6093268                                           | 6116130                                            | 1.0                                                |
| BaCH <sub>3</sub> CO <sub>2</sub> <sup>+</sup> | 19704102                                          | 20035601                                           | 1.0                                                |
| BaHCO <sub>3</sub> <sup>+</sup>                | 7693602                                           | 3112077                                            | 0.4                                                |
| BaNO <sub>3</sub> <sup>+</sup>                 | 7913648                                           | 5352257                                            | 0.7                                                |
| m/z 212                                        | 7945654                                           | 779305                                             | 0.1                                                |
| m/z 227                                        | 3152652                                           | 936194                                             | 0.3                                                |
| m/z 243                                        | 2460505                                           | 938767                                             | 0.4                                                |
| m/z 257                                        | 1432298                                           | Not Detected                                       | N/A                                                |
| m/z 259                                        | 1784372                                           | 1085369                                            | 0.6                                                |

The ions with assigned formulas account for 79% and 86% of the total major ion intensities in soft and harsh ion sampling conditions, respectively.

**Optimized geometries and energies (Hartree/particle) at  $\omega$ B97xD/aug-cc-pVTZ level of theory:**

**BaCH<sub>3</sub>CO<sub>2</sub><sup>+</sup>**

-----  
Element        Coordinates (Angstroms)  
                  X        Y        Z  
-----

|    |           |           |           |
|----|-----------|-----------|-----------|
| Ba | -1.054308 | -0.000016 | 0.001278  |
| O  | 1.126496  | 1.100688  | -0.006516 |
| O  | 1.126475  | -1.100497 | -0.006600 |
| C  | 1.766922  | 0.000106  | -0.012420 |
| C  | 3.257698  | -0.000044 | 0.001390  |
| H  | 3.643663  | 0.899460  | -0.469062 |
| H  | 3.643281  | -0.896650 | -0.474952 |
| H  | 3.582826  | -0.003820 | 1.043543  |

-----  
Rotational symmetry number =                    1  
Zero-point correction=                            0.050552  
Sum of electronic and zero-point Energies=    -253.834195  
Sum of electronic and thermal Energies=       -253.828013  
Sum of electronic and thermal Enthalpies=     -253.827069  
Sum of electronic and thermal Free Energies=   -253.867057

**BaF<sup>+</sup>**

---

| Element | Coordinates (Angstroms) |          |           |
|---------|-------------------------|----------|-----------|
|         | X                       | Y        | Z         |
| F       | 0.000000                | 0.000000 | -1.824729 |
| Ba      | 0.000000                | 0.000000 | 0.293260  |

---

|                                              |             |
|----------------------------------------------|-------------|
| Rotational symmetry=                         | 1           |
| Zero-point correction=                       | 0.001198    |
| Sum of electronic and zero-point Energies=   | -125.224971 |
| Sum of electronic and thermal Energies=      | -125.222405 |
| Sum of electronic and thermal Enthalpies=    | -125.221460 |
| Sum of electronic and thermal Free Energies= | -125.248642 |

**BaF(H<sub>2</sub>O)<sub>2</sub><sup>+</sup>**

---

| Element | Coordinates (Angstroms) |           |           |
|---------|-------------------------|-----------|-----------|
|         | X                       | Y         | Z         |
| Ba      | -0.000000               | -0.564054 | 0.065697  |
| O       | -2.200676               | 0.797206  | -0.563469 |
| H       | -1.945093               | 1.620238  | -0.125336 |
| H       | -3.062469               | 0.930024  | -0.960414 |
| O       | 2.200676                | 0.797204  | -0.563470 |
| H       | 1.945094                | 1.620236  | -0.125335 |
| H       | 3.062470                | 0.930022  | -0.960417 |
| F       | 0.000002                | 1.525694  | 0.834223  |

---

---

|                                              |             |
|----------------------------------------------|-------------|
| Rotational symmetry=                         | 1           |
| Zero-point correction=                       | 0.051000    |
| Sum of electronic and zero-point Energies=   | -278.132649 |
| Sum of electronic and thermal Energies=      | -278.124440 |
| Sum of electronic and thermal Enthalpies=    | -278.123496 |
| Sum of electronic and thermal Free Energies= | -278.166896 |

---



**Ba(H<sub>2</sub>O)<sub>3</sub><sup>+2</sup>**

---

| Element | Coordinates (Angstroms) |           |           |
|---------|-------------------------|-----------|-----------|
|         | X                       | Y         | Z         |
| Ba      | 0.000245                | -0.000525 | -0.279599 |
| O       | -2.313402               | -1.090543 | 0.488586  |
| H       | -2.446557               | -1.808923 | 1.117603  |
| H       | -3.202606               | -0.865705 | 0.191335  |
| O       | 2.102391                | -1.454420 | 0.489265  |
| H       | 2.797934                | -1.203314 | 1.107646  |
| H       | 2.347402                | -2.341462 | 0.201886  |
| O       | 0.209930                | 2.547533  | 0.488683  |
| H       | 0.842072                | 3.209108  | 0.184893  |
| H       | -0.343328               | 3.019131  | 1.121898  |

---

|                                              |             |
|----------------------------------------------|-------------|
| Rotational symmetry=                         | 3           |
| Zero-point correction=                       | 0.072644    |
| Sum of electronic and zero-point Energies=   | -254.321555 |
| Sum of electronic and thermal Energies=      | -254.310582 |
| Sum of electronic and thermal Enthalpies=    | -254.309638 |
| Sum of electronic and thermal Free Energies= | -254.363051 |

**BaHCO<sub>2</sub><sup>+</sup>**

---

| Element | Coordinates (Angstroms) |           |           |
|---------|-------------------------|-----------|-----------|
|         | X                       | Y         | Z         |
| Ba      | -0.711409               | 0.000000  | -0.000000 |
| O       | 1.497801                | -1.104647 | 0.000000  |
| O       | 1.497802                | 1.104647  | 0.000000  |
| C       | 2.111233                | -0.000000 | -0.000000 |
| H       | 3.206701                | -0.000001 | -0.000002 |

---

|                                              |             |
|----------------------------------------------|-------------|
| Rotational symmetry number=                  | 2           |
| Zero-point correction=                       | 0.023022    |
| Sum of electronic and zero-point Energies=   | -214.529073 |
| Sum of electronic and thermal Energies=      | -214.524665 |
| Sum of electronic and thermal Enthalpies=    | -214.523721 |
| Sum of electronic and thermal Free Energies= | -214.557767 |

**BaHCO<sub>3</sub><sup>+</sup>**

---

| Element | Coordinates (Angstroms) |           |           |
|---------|-------------------------|-----------|-----------|
|         | X                       | Y         | Z         |
| Ba      | -1.025791               | -0.005978 | -0.000001 |
| O       | 1.188757                | -1.095252 | 0.000004  |
| O       | 1.135406                | 1.119154  | 0.000004  |
| C       | 1.779407                | 0.031705  | 0.000002  |
| O       | 3.090601                | 0.094193  | -0.000005 |
| H       | 3.449761                | -0.800191 | -0.000001 |

---

Rotational symmetry number= 1  
Zero-point correction= 0.028834  
Sum of electronic and zero-point Energies= -289.785049  
Sum of electronic and thermal Energies= -289.779940  
Sum of electronic and thermal Enthalpies= -289.778996  
Sum of electronic and thermal Free Energies= -289.815845

**BaNO<sub>2</sub><sup>+</sup>**

---

| Element | Coordinates (Angstroms) |           |           |
|---------|-------------------------|-----------|-----------|
|         | X                       | Y         | Z         |
| Ba      | 0.723789                | -0.000000 | -0.000096 |
| N       | -2.243898               | 0.000002  | 0.000358  |
| O       | -1.551552               | 1.051823  | 0.000181  |
| O       | -1.551559               | -1.051822 | 0.000180  |

---

Rotational symmetry number= 2  
Zero-point correction= 0.009342  
Sum of electronic and zero-point Energies= -230.465677  
Sum of electronic and thermal Energies= -230.461078  
Sum of electronic and thermal Enthalpies= -230.460133  
Sum of electronic and thermal Free Energies= -230.494952

**BaNO<sub>3</sub><sup>+</sup>**

---

| Element | Coordinates (Angstroms) |           |          |
|---------|-------------------------|-----------|----------|
|         | X                       | Y         | Z        |
| N       | 0.000000                | -1.906549 | 0.000000 |
| O       | -1.083483               | -1.207823 | 0.000000 |
| O       | 1.083481                | -1.207823 | 0.000000 |
| O       | 0.000000                | -3.084568 | 0.000000 |
| Ba      | 0.000000                | 1.024063  | 0.000000 |

---

|                                              |             |
|----------------------------------------------|-------------|
| Rotational symmetry number=                  | 2           |
| Zero-point correction=                       | 0.015811    |
| Sum of electronic and zero-point Energies=   | -305.667645 |
| Sum of electronic and thermal Energies=      | -305.662794 |
| Sum of electronic and thermal Enthalpies=    | -305.661850 |
| Sum of electronic and thermal Free Energies= | -305.697638 |

**BaOH<sup>+</sup>**

---

| Element | Coordinates (Angstroms) |           |           |
|---------|-------------------------|-----------|-----------|
|         | X                       | Y         | Z         |
| Ba      | 0.003773                | -0.309671 | -0.000000 |
| O       | 0.003773                | 1.824496  | 0.000000  |
| H       | -0.241442               | 2.745579  | 0.000000  |

---

---

|                                              |             |
|----------------------------------------------|-------------|
| Rotational symmetry number=                  | 1           |
| Zero-point correction=                       | 0.011228    |
| Sum of electronic and zero-point Energies=   | -101.175270 |
| Sum of electronic and thermal Energies=      | -101.171925 |
| Sum of electronic and thermal Enthalpies=    | -101.170981 |
| Sum of electronic and thermal Free Energies= | -101.199396 |

## CO<sub>2</sub>

---

| Element | Coordinates (Angstroms) |          |           |
|---------|-------------------------|----------|-----------|
|         | X                       | Y        | Z         |
| C       | 0.000000                | 0.000000 | 0.000000  |
| O       | 0.000000                | 0.000000 | 1.156497  |
| O       | 0.000000                | 0.000000 | -1.156497 |

---

Rotational symmetry number= 2  
Zero-point correction= 0.011877  
Sum of electronic and zero-point Energies= -188.586595  
Sum of electronic and thermal Energies= -188.583991  
Sum of electronic and thermal Enthalpies= -188.583047  
Sum of electronic and thermal Free Energies= -188.607276

## H<sub>2</sub>CO<sub>3</sub>

---

| Element | Coordinates (Angstroms) |           |           |
|---------|-------------------------|-----------|-----------|
|         | X                       | Y         | Z         |
| O       | -1.083284               | -0.675457 | -0.000020 |
| O       | 0.000007                | 1.298796  | -0.000093 |
| C       | -0.000000               | 0.098509  | -0.000007 |
| O       | 1.083278                | -0.675465 | 0.000116  |
| H       | 1.843697                | -0.087028 | 0.000121  |
| H       | -1.843698               | -0.087013 | -0.000108 |

---

|                                              |             |
|----------------------------------------------|-------------|
| Rotational symmetry number=                  | 2           |
| Zero-point correction=                       | 0.040335    |
| Sum of electronic and zero-point Energies=   | -264.995631 |
| Sum of electronic and thermal Energies=      | -264.991960 |
| Sum of electronic and thermal Enthalpies=    | -264.991015 |
| Sum of electronic and thermal Free Energies= | -265.020835 |



## H<sub>2</sub>O

---

| Element | Coordinates (Angstroms) |           |           |
|---------|-------------------------|-----------|-----------|
|         | X                       | Y         | Z         |
| O       | 0.000000                | 0.000000  | 0.116444  |
| H       | 0.000000                | 0.760003  | -0.465774 |
| H       | -0.000000               | -0.760003 | -0.465774 |

---

---

Rotational symmetry number= 2  
Zero-point correction= 0.021646  
Sum of electronic and zero-point Energies= -76.418282  
Sum of electronic and thermal Energies= -76.415447  
Sum of electronic and thermal Enthalpies= -76.414502  
Sum of electronic and thermal Free Energies= -76.435910

### **H<sub>3</sub>O<sup>+</sup>**

---

| Element | Coordinates (Angstroms) |           |           |
|---------|-------------------------|-----------|-----------|
|         | X                       | Y         | Z         |
| O       | 0.000000                | 0.000000  | 0.073417  |
| H       | 0.000000                | 0.936910  | -0.195779 |
| H       | 0.811388                | -0.468455 | -0.195779 |
| H       | -0.811388               | -0.468455 | -0.195779 |

---

---

|                                              |            |
|----------------------------------------------|------------|
| Rotational symmetry number=                  | 3          |
| Zero-point correction=                       | 0.034879   |
| Sum of electronic and zero-point Energies=   | -76.682618 |
| Sum of electronic and thermal Energies=      | -76.679713 |
| Sum of electronic and thermal Enthalpies=    | -76.678768 |
| Sum of electronic and thermal Free Energies= | -76.700703 |

## CH<sub>3</sub>CO<sub>2</sub>H

---

| Element | Coordinates (Angstroms) |           |           |
|---------|-------------------------|-----------|-----------|
|         | X                       | Y         | Z         |
| C       | 0.000000                | 0.153620  | 0.000000  |
| C       | 1.052240                | -0.914069 | 0.000000  |
| O       | 0.197069                | 1.337514  | 0.000000  |
| H       | 2.035505                | -0.456382 | 0.000000  |
| H       | 0.932535                | -1.547175 | 0.878222  |
| H       | 0.932535                | -1.547175 | -0.878222 |
| O       | -1.241602               | -0.369775 | 0.000000  |
| H       | -1.857748               | 0.371517  | 0.000000  |

---

---

|                                              |             |
|----------------------------------------------|-------------|
| Rotational symmetry number=                  | 1           |
| Zero-point correction=                       | 0.062255    |
| Sum of electronic and zero-point Energies=   | -229.045439 |
| Sum of electronic and thermal Energies=      | -229.040873 |
| Sum of electronic and thermal Enthalpies=    | -229.039929 |
| Sum of electronic and thermal Free Energies= | -229.072735 |

## HF

---

| Element | Coordinates (Angstroms) |          |           |
|---------|-------------------------|----------|-----------|
|         | X                       | Y        | Z         |
| H       | 0.000000                | 0.000000 | -0.826602 |
| F       | 0.000000                | 0.000000 | 0.091845  |

---

---

|                                              |             |
|----------------------------------------------|-------------|
| Rotational symmetry number=                  | 1           |
| Zero-point correction=                       | 0.009458    |
| Sum of electronic and zero-point Energies=   | -100.451878 |
| Sum of electronic and thermal Energies=      | -100.449518 |
| Sum of electronic and thermal Enthalpies=    | -100.448574 |
| Sum of electronic and thermal Free Energies= | -100.468277 |

## HNO<sub>2</sub>

---

| Element | Coordinates (Angstroms) |           |           |
|---------|-------------------------|-----------|-----------|
|         | X                       | Y         | Z         |
| O       | -1.092843               | -0.219826 | -0.000001 |
| N       | -0.165955               | 0.481674  | 0.000001  |
| H       | 1.705046                | 0.427828  | -0.000006 |
| O       | 1.024923                | -0.255117 | 0.000001  |

---

---

|                                              |             |
|----------------------------------------------|-------------|
| Rotational symmetry number=                  | 1           |
| Zero-point correction=                       | 0.020791    |
| Sum of electronic and zero-point Energies=   | -205.699832 |
| Sum of electronic and thermal Energies=      | -205.696644 |
| Sum of electronic and thermal Enthalpies=    | -205.695700 |
| Sum of electronic and thermal Free Energies= | -205.723778 |

## HNO<sub>3</sub>

---

| Element | Coordinates (Angstroms) |           |           |
|---------|-------------------------|-----------|-----------|
|         | X                       | Y         | Z         |
| N       | -0.143366               | 0.034666  | 0.000000  |
| O       | 1.112081                | -0.554669 | -0.000000 |
| O       | -0.156239               | 1.237185  | -0.000000 |
| O       | -1.044557               | -0.738184 | -0.000000 |
| H       | 1.713288                | 0.202682  | 0.000000  |

---

|                                              |             |
|----------------------------------------------|-------------|
| Rotational symmetry number=                  | 1           |
| Zero-point correction=                       | 0.027109    |
| Sum of electronic and zero-point Energies=   | -280.886260 |
| Sum of electronic and thermal Energies=      | -280.882797 |
| Sum of electronic and thermal Enthalpies=    | -280.881852 |
| Sum of electronic and thermal Free Energies= | -280.911948 |

## HCO<sub>2</sub>H

---

| Element | Coordinates (Angstroms) |           |           |
|---------|-------------------------|-----------|-----------|
|         | X                       | Y         | Z         |
| C       | 0.133491                | 0.397580  | 0.000004  |
| O       | 1.128396                | -0.263469 | 0.000005  |
| O       | -1.110898               | -0.089707 | -0.000007 |
| H       | 0.106733                | 1.493071  | 0.000016  |
| H       | -1.047668               | -1.053142 | -0.000016 |

---

|                                              |             |
|----------------------------------------------|-------------|
| Rotational symmetry number=                  | 1           |
| Zero-point correction=                       | 0.034175    |
| Sum of electronic and zero-point Energies=   | -189.745763 |
| Sum of electronic and thermal Energies=      | -189.742603 |
| Sum of electronic and thermal Enthalpies=    | -189.741659 |
| Sum of electronic and thermal Free Energies= | -189.769825 |
